# Supplementary material for: Model membrane size-dependent amyloidogenesis of Alzheimer's amyloid-β peptides
Source: Royal Society of Chemistry journal article supplement (doi:10.1039/c6cp07774a), 2017-01-01
Supplement: c6cp07774a1.pdf [file c6cp07774a1.pdf]

## Analytical Data

Record: 150608 (Bulk \* 650628 ) ; Date: 2015-9-15

**Code:** 4349-v Lot No: 650810

**Compound:** Amyloid  $\beta$ -Protein (Human,1-42) (Trifluoroacetate Form)  
Asp-Ala-Glu-Phe-Arg-His-Asp-Ser-Gly-Tyr-Glu-Val-His-His-  
Gln-Lys-Leu-Val-Phe-Phe-Ala-Glu-Asp-Val-Gly-Ser-Asn-Lys-  
Gly-Ala-Ile-Ile-Gly-Leu-Met-Val-Gly-Gly-Val-Val-Ile-Ala  
(M. W. 4514.04) C<sub>203</sub> H<sub>311</sub> N<sub>55</sub> O<sub>60</sub> S<sub>1</sub>

**Appearance** : White amorphous powder

\* **Elemental Analysis**

Found C, 47.24 ; H, 6.04 ; N, 13.93 %

\* **Amino Acid Analysis**

Acid Hydrolysis: 6N HCl, 110°C, 22h. \* concHCl:TFA:H<sub>2</sub>O=2:1:1, 150°C, 4h.

|              |                          |              |               |
|--------------|--------------------------|--------------|---------------|
| Asp (4) 3.98 | Ser (2) 1.79             | Glu (4) 4.03 | Gly (6) 5.86  |
| Ala (4) 3.96 | Val (6) 5.84*            | Met (1) 0.93 | Ile (3) 2.65* |
| Leu (2) 2.00 | Tyr (1) 0.95             | Phe (3) 2.99 | His (3) 2.91  |
| Lys (2) 2.03 | NH <sub>3</sub> (2) 2.48 | Arg (1) 1.00 |               |

\* **Mass Spectral Analysis** : Exhibits correct MW

**Purity(HPLC)** : 95.3%

Computer generated document  
Valid without signature

Peptide Institute, Inc.  
Quality Control Dept.  
www.peptide.co.jp

Sample : 4349-v Amyloid  $\beta$ -Protein (Human,1-42)  
Sample Size : 0.5  $\mu$ L ( 0.5 mg/ 50  $\mu$ L-DMSO )  
Column : Agilent ZORBAX 300SB-C18 (4.6 mm I.D.  $\times$ 150 mm) #WSB1252003  
Eluent : 0.1% TFA  
Gradient : Acetonitrile 20% to 60% [25 min.]  
Flow Rate : 1.0 mL/min. , ; Press. : 31 kg/cm<sup>2</sup> , ; Temp. : 80°C  
Detection : CH.1 220 nm

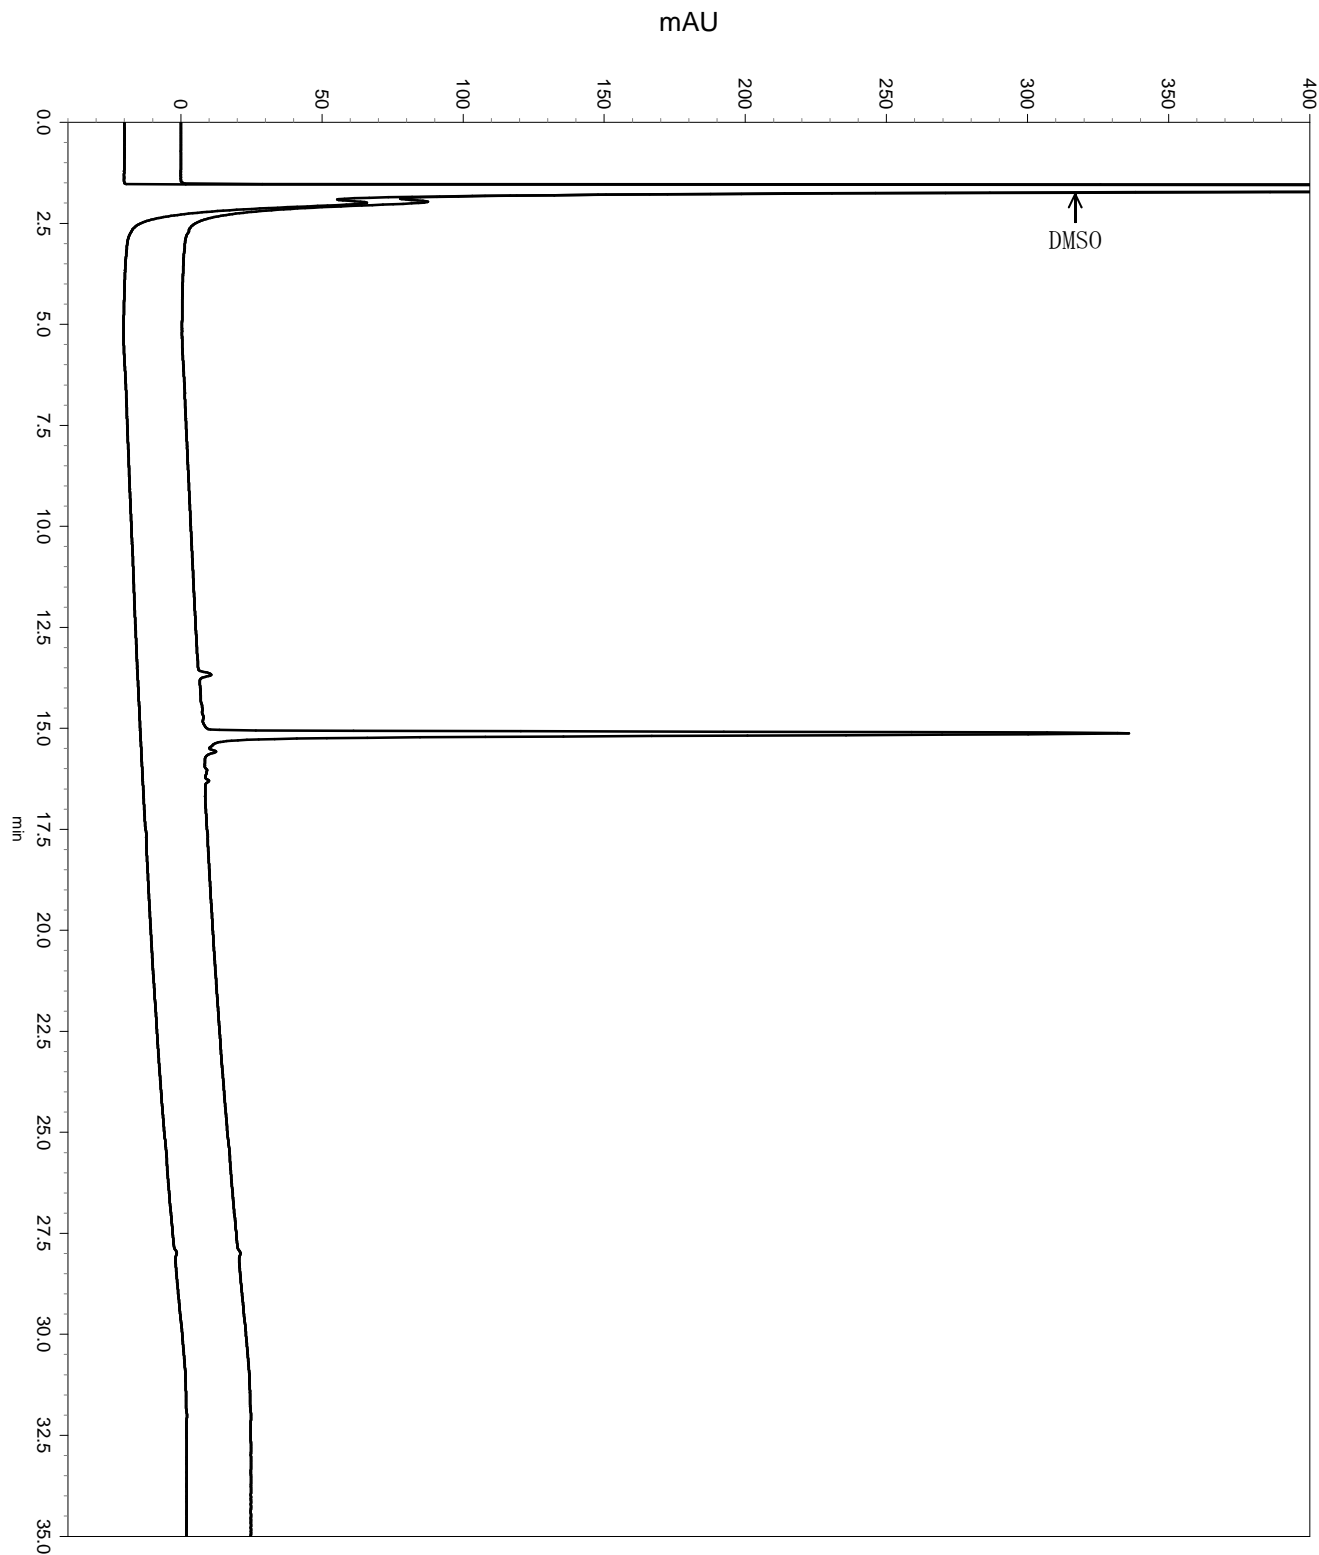

# Non-denaturation PAGE

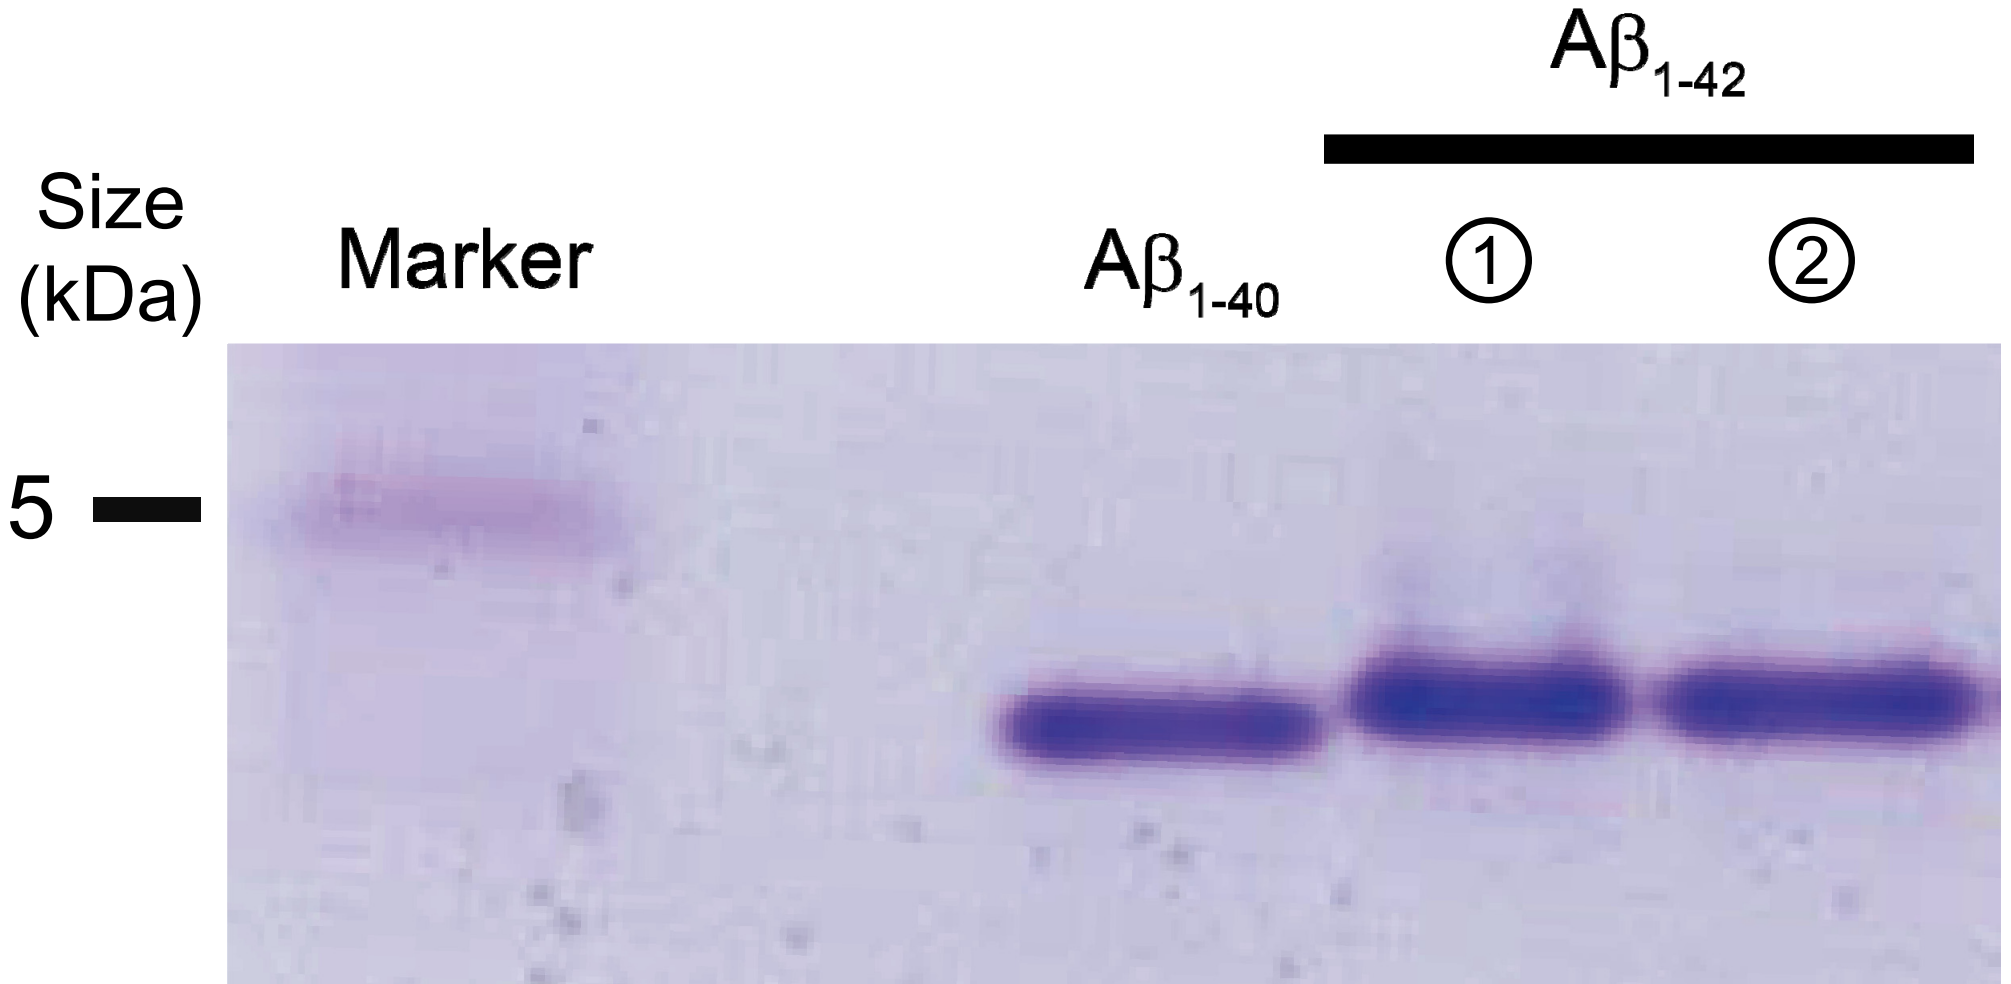

① Sample without ultracentrifugation treatment

② Supernatant after ultracentrifugation at 60,000 rpm for 1 hr
